# Supplementary material for: Dosimetry and Gastrointestinal Toxicity Relationships in a Phase II Trial of Pelvic Lymph Node Radiotherapy in Advanced Localised Prostate Cancer
Source: PubMed Central journal article supplement — Clin Oncol (R Coll Radiol). 2019 Jun;31(6):374–84. doi: 10.1016/j.clon.2019.02.012 (PMC6505687; doi:10.1016/j.clon.2019.02.012), 2019-06
Supplement: mmc1.pdf [file mmc1.pdf]

**DOSIMETRY AND GASTROINTESTINAL TOXICITY RELATIONSHIPS IN A PHASE 2 TRIAL OF PELVIC  
LYMPH NODE RADIOTHERAPY IN ADVANCED LOCALISED PROSTATE CANCER.**

**- SUPPLEMENTARY MATERIAL -**

**Table SUPP-1:** IMRT trial dose-volume constraints for rectum and bowel.

| <b>RECTUM</b>               |                            |                             |                            | <b>BOWEL</b>                |                                                 |                             |                                                 |
|-----------------------------|----------------------------|-----------------------------|----------------------------|-----------------------------|-------------------------------------------------|-----------------------------|-------------------------------------------------|
| <b>2Gy/fraction</b>         |                            | <b>3Gy/fraction*</b>        |                            | <b>2Gy/fraction</b>         |                                                 | <b>3Gy/fraction*</b>        |                                                 |
| <b>Dose constraint (Gy)</b> | <b>Volume required (%)</b> | <b>Dose constraint (Gy)</b> | <b>Volume required (%)</b> | <b>Dose constraint (Gy)</b> | <b>Volume required (cc) Mandatory (optimal)</b> | <b>Dose constraint (Gy)</b> | <b>Volume required (cc) Mandatory (optimal)</b> |
| rV50                        | 60                         | rV43                        | 60                         | bV45                        | 158 (78)                                        | bV39                        | 158 (78)                                        |
| rV60                        | 50                         | rV51                        | 50                         | bV50                        | 110 (17)                                        | bV43                        | 110 (17)                                        |
| rV65                        | 30                         | rV55                        | 30                         | bV55                        | 28 (14)                                         | bV47                        | 28 (14)                                         |
| rV70                        | 15                         | rV59                        | 15                         | bV60                        | 6 (0)                                           | bV51                        | 6 (0)                                           |
| rV75                        | 3                          | rV63                        | 0                          | bV65                        | 0 (0)                                           | bV55                        | 0 (0)                                           |

*\*Constraints for the 3Gy cohorts were simply extrapolated from the 2Gy cohort in a ratio of 60/70 (reflecting the initial prostate treatment dose of 70Gy) with no implicit radiobiological assumptions.*

**Table SUPP-2: Toxicity thresholds for patient-reported outcomes.**

| CLINICIAN-REPORTED OUTCOMES    |                                       |                                   |                                   |
|--------------------------------|---------------------------------------|-----------------------------------|-----------------------------------|
| Scale                          |                                       | Threshold                         |                                   |
|                                |                                       | <i>Mild</i>                       | <i>Moderate/severe</i>            |
| RTOG                           |                                       | NS: grade 0                       | NS: grade 0/1                     |
|                                |                                       | vs.                               | vs.                               |
|                                |                                       | S: grade 1+                       | S: grade 2+                       |
| LENT-SOM                       |                                       | NS: grade 0                       | NS: grade 0/1                     |
|                                |                                       | vs.                               | vs.                               |
|                                |                                       | S: grade 1+                       | S: grade 2+                       |
| PATIENT-REPORTED OUTCOMES      |                                       |                                   |                                   |
| Scale                          | Reported outcome<br>(question number) | Threshold                         |                                   |
|                                |                                       | <i>Mild</i>                       | <i>Moderate/severe</i>            |
| UCLA-PCI                       | Rectal urgency<br>(question 17)       | NS: once a week or less           | NS: more than once a week or less |
|                                |                                       | vs.                               | vs.                               |
|                                |                                       | S: at least more than once a week | S: at least once a day            |
|                                | Loose/liquid stools<br>(question 18)  | NS: rarely or less                | NS: about half the time or less   |
|                                |                                       | vs.                               | vs.                               |
|                                |                                       | S: at least about half the time   | S: at least usually               |
|                                | Bowel distress<br>(question 19)       | NS: a little distress or less     | NS: moderate distress or less     |
|                                |                                       | vs.                               | vs.                               |
|                                |                                       | S: at least moderate distress     | S: severe distress                |
|                                | Crampy pain<br>(question 20)          | NS: about once a week or less     | NS: several times a week or less  |
|                                |                                       | vs.                               | vs.                               |
|                                |                                       | S: at least several times a week  | S: at least about once a day      |
| Bowel problem<br>(question 21) | NS: very small problem or less        | NS: small problem or less         |                                   |
|                                | vs.                                   | vs.                               |                                   |
|                                | S: at least small problem             | S: at least moderate problem      |                                   |

*NS=Non-symptomatic group; S=Symptomatic group.*

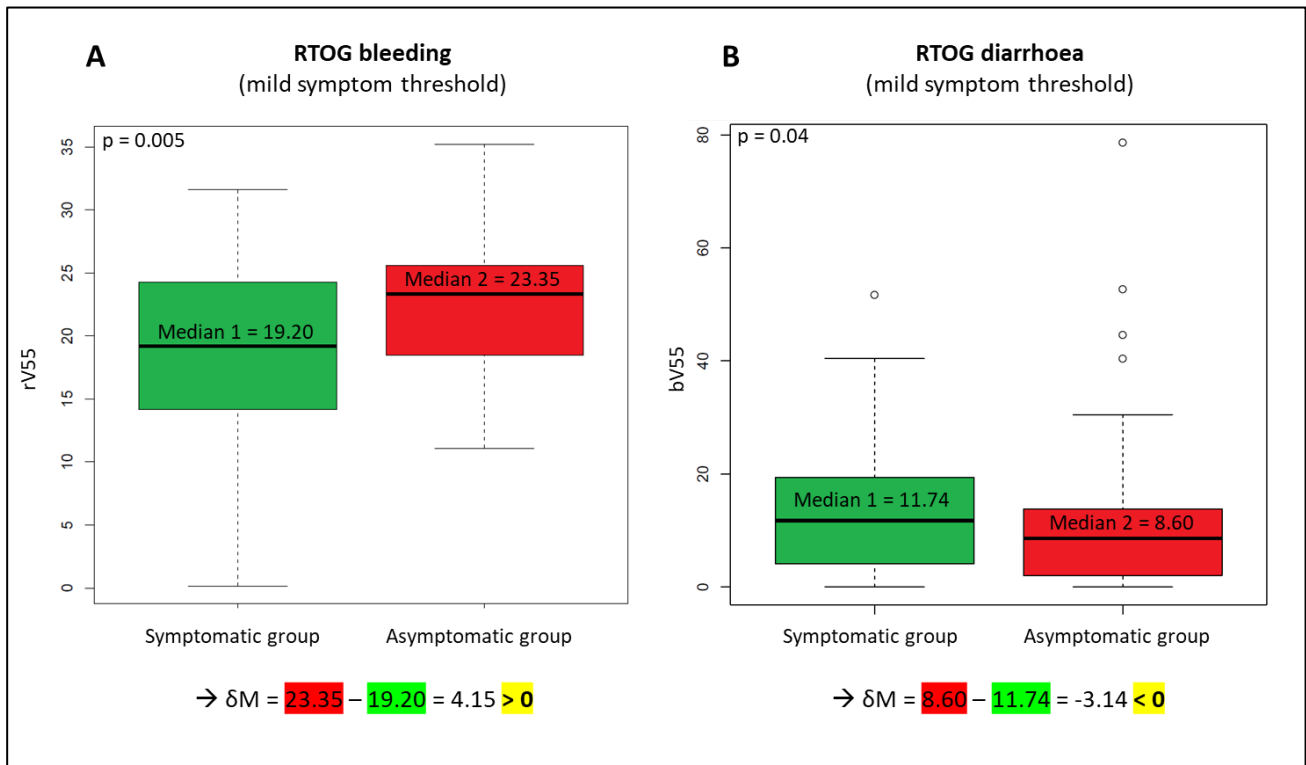

**Figure SUPP-1: Example of  $\delta M$  in two results where  $p < 0.05$  (A: HFRT-4D, B: CFRT).  $\delta M = \text{Median 2} - \text{Median 1}$ .  
 A:  $\delta M = 4.15$ , indicating that median  $rv55$  is higher in patients with (red) than in patients without (green) symptoms.  
 B:  $\delta M = -3.14$ , indicating that median  $bv55$  is higher in patients without (green) than in patients with (red) symptoms.**

**Table SUPP-3: Number of statistical tests used per toxicity scale by cohort (analysis of dosepoints/toxicity relationships).**

|         | Rectum |          |          | Bowel |          |          |
|---------|--------|----------|----------|-------|----------|----------|
|         | RTOG   | LENT-SOM | UCLA-PCI | RTOG  | LENT-SOM | UCLA-PCI |
| CFRT    | 32     | 52       | 36       | 12    | 15       | 27       |
| HFRT-4D | 32     | 56       | 40       | 12    | 24       | 30       |
| HFRT-5D | 32     | 56       | 36       | 12    | 18       | 27       |

Some dosepoints and toxicity endpoints were excluded as per the criteria included in the materials and methods section (subsections: "Radiation-induced GI toxicity data" and "Statistical considerations"), explaining differences in the number of statistical tests between cohorts.

**Table SUPP-4:** Numbers and proportions of patients failing rectum constraints in the CFRT cohort.

| RECTUM<br>CFRT                                                      | rV50     | rV60    | rV65    | rV70    | rV75    |
|---------------------------------------------------------------------|----------|---------|---------|---------|---------|
| <b>CONSTRAINTS<br/>(% of rectal volume)</b>                         | 60       | 50      | 30      | 15      | 3       |
| <b>MEAN volume</b>                                                  | 55.19 %  | 27.73 % | 17.73 % | 3.27 %  | 0.02%   |
| <b>Standard Deviation</b>                                           | 11.84%   | 8.32%   | 6.71%   | 2.94%   | 0.20%   |
| <b>Number of patients<br/>failing constraint<br/>(total number)</b> | 50 (193) | 0 (193) | 3 (198) | 0 (197) | 0 (190) |

*Means and standard deviations are reported for reference.*

*All N/A values were excluded for analysis in a dosimetric dose-point by dose-point basis.*

**Table SUPP-5:** Numbers and proportions of patients failing rectum constraints in the HFRT-4D cohort.

| RECTUM<br>HFRT-4D                                                   | rV43    | rV51    | rV55    | rV59    | rV63    |
|---------------------------------------------------------------------|---------|---------|---------|---------|---------|
| <b>CONSTRAINTS<br/>(% of rectal volume)</b>                         | 60      | 50      | 30      | 15      | 0       |
| <b>MEAN volume</b>                                                  | 49.67%  | 28.17%  | 20.43%  | 9.11%   | 0%      |
| <b>Standard Deviation</b>                                           | 6.70%   | 6.90%   | 6.45%   | 3.40%   | 0%      |
| <b>Number of patients<br/>failing constraint<br/>(total number)</b> | 5 (119) | 0 (119) | 3 (119) | 2 (119) | 0 (119) |

*Means and standard deviations are reported for reference. All N/A values were excluded for analysis in a dosimetric dose-point by dose-point basis.*

**Table SUPP-6:** Numbers and proportions of patients failing rectum constraints in the HFRT-5D cohort.

| RECTUM<br>HFRT-5D                                                   | rV43       | rV51       | rV55       | rV59      | rV63       |
|---------------------------------------------------------------------|------------|------------|------------|-----------|------------|
| <b>CONSTRAINTS<br/>(% of rectal volume)</b>                         | 60         | 50         | 30         | 15        | 0          |
| <b>MEAN volume</b>                                                  | 52.12<br>% | 28.05<br>% | 20.19<br>% | 8.79<br>% | 0.002<br>% |
| <b>Standard Deviation</b>                                           | 6.63<br>%  | 7.25<br>%  | 6.40<br>%  | 3.53<br>% | 0.01<br>%  |
| <b>Number of patients<br/>failing constraint<br/>(total number)</b> | 2 (53)     | 0 (53)     | 2 (53)     | 1 (53)    | 1 (53)     |

*Means and standard deviations are reported for reference.*

*All N/A values were excluded for analysis in a dosimetric dose-point by dose-point basis.*

**Table SUPP-7:** Numbers and proportions of patients failing bowel constraints in the CFRT cohort.

| BOWEL<br>CFRT                                                             | bV45      | bV50      | bV55     | bV60      | bV65     |
|---------------------------------------------------------------------------|-----------|-----------|----------|-----------|----------|
| <b>Optimal CONSTRAINTS (cc)</b>                                           | 78        | 17        | 14       | 0         | 0        |
| <b>Mandatory CONSTRAINTS (cc)</b>                                         | 158       | 110       | 28       | 6         | 0        |
| <b>MEAN volume (cc)</b>                                                   | 84.03     | 41.72     | 12.51    | 0.96      | 0.08     |
| <b>Standard Deviation</b>                                                 | 42.34     | 25.42     | 11.68    | 1.87      | 0.45     |
| <b>Number of patients failing<br/>optimal constraint (total number)</b>   | 118 (236) | 192 (236) | 83 (236) | 137 (232) | 16 (229) |
| <b>Number of patients failing<br/>mandatory constraint (total number)</b> | 12 (236)  | 2 (236)   | 22 (236) | 2 (232)   | 16 (229) |

*Means and standard deviations are reported for reference.*

*All N/A values were excluded for analysis in a dosimetric dose-point by dose-point basis.*

**Table SUPP-8:** Numbers and proportions of patients failing bowel constraints in the HFRT-4D cohort.

| BOWEL<br>HFRT-4D                                                          | bV39     | bV43     | bV47    | bV51     | bV55     |
|---------------------------------------------------------------------------|----------|----------|---------|----------|----------|
| <b>Optimal CONSTRAINTS (cc)</b>                                           | 78       | 17       | 14      | 0        | 0        |
| <b>Mandatory CONSTRAINTS (cc)</b>                                         | 158      | 110      | 28      | 6        | 0        |
| <b>MEAN volume (cc)</b>                                                   | 75.33    | 29.39    | 3.13    | 0.85     | 0.35     |
| <b>Standard Deviation</b>                                                 | 37.26    | 17.63    | 3.92    | 2.28     | 1.35     |
| <b>Number of patients failing<br/>optimal constraint (total number)</b>   | 47 (119) | 87 (119) | 2 (119) | 38 (119) | 22 (119) |
| <b>Number of patients failing<br/>mandatory constraint (total number)</b> | 0 (119)  | 0 (119)  | 0 (119) | 4 (119)  | 22 (119) |

*Means and standard deviations are reported for reference.*

*All N/A values were excluded for analysis in a dosimetric dose-point by dose-point basis.*

**Table SUPP-9:** Numbers and proportions of patients failing bowel constraints in the HFRT-5D cohort.

| BOWEL<br>HFRT-5D                                                          | bV39    | bV43    | bV47   | bV51    | bV55   |
|---------------------------------------------------------------------------|---------|---------|--------|---------|--------|
| <b>Optimal CONSTRAINTS (cc)</b>                                           | 78      | 17      | 14     | 0       | 0      |
| <b>Mandatory CONSTRAINTS (cc)</b>                                         | 158     | 110     | 28     | 6       | 0      |
| <b>MEAN volume (cc)</b>                                                   | 90.74   | 38.24   | 4.38   | 0.65    | 0.20   |
| <b>Standard Deviation</b>                                                 | 38.10   | 19.41   | 4.11   | 1.52    | 0.62   |
| <b>Number of patients failing<br/>optimal constraint (total number)</b>   | 28 (53) | 48 (53) | 2 (53) | 17 (53) | 9 (53) |
| <b>Number of patients failing<br/>mandatory constraint (total number)</b> | 4 (53)  | 1 (53)  | 0 (53) | 1 (53)  | 9 (53) |

*Means and standard deviations are reported for reference.*

*All N/A values were excluded for analysis in a dosimetric dose-point by dose-point basis.*

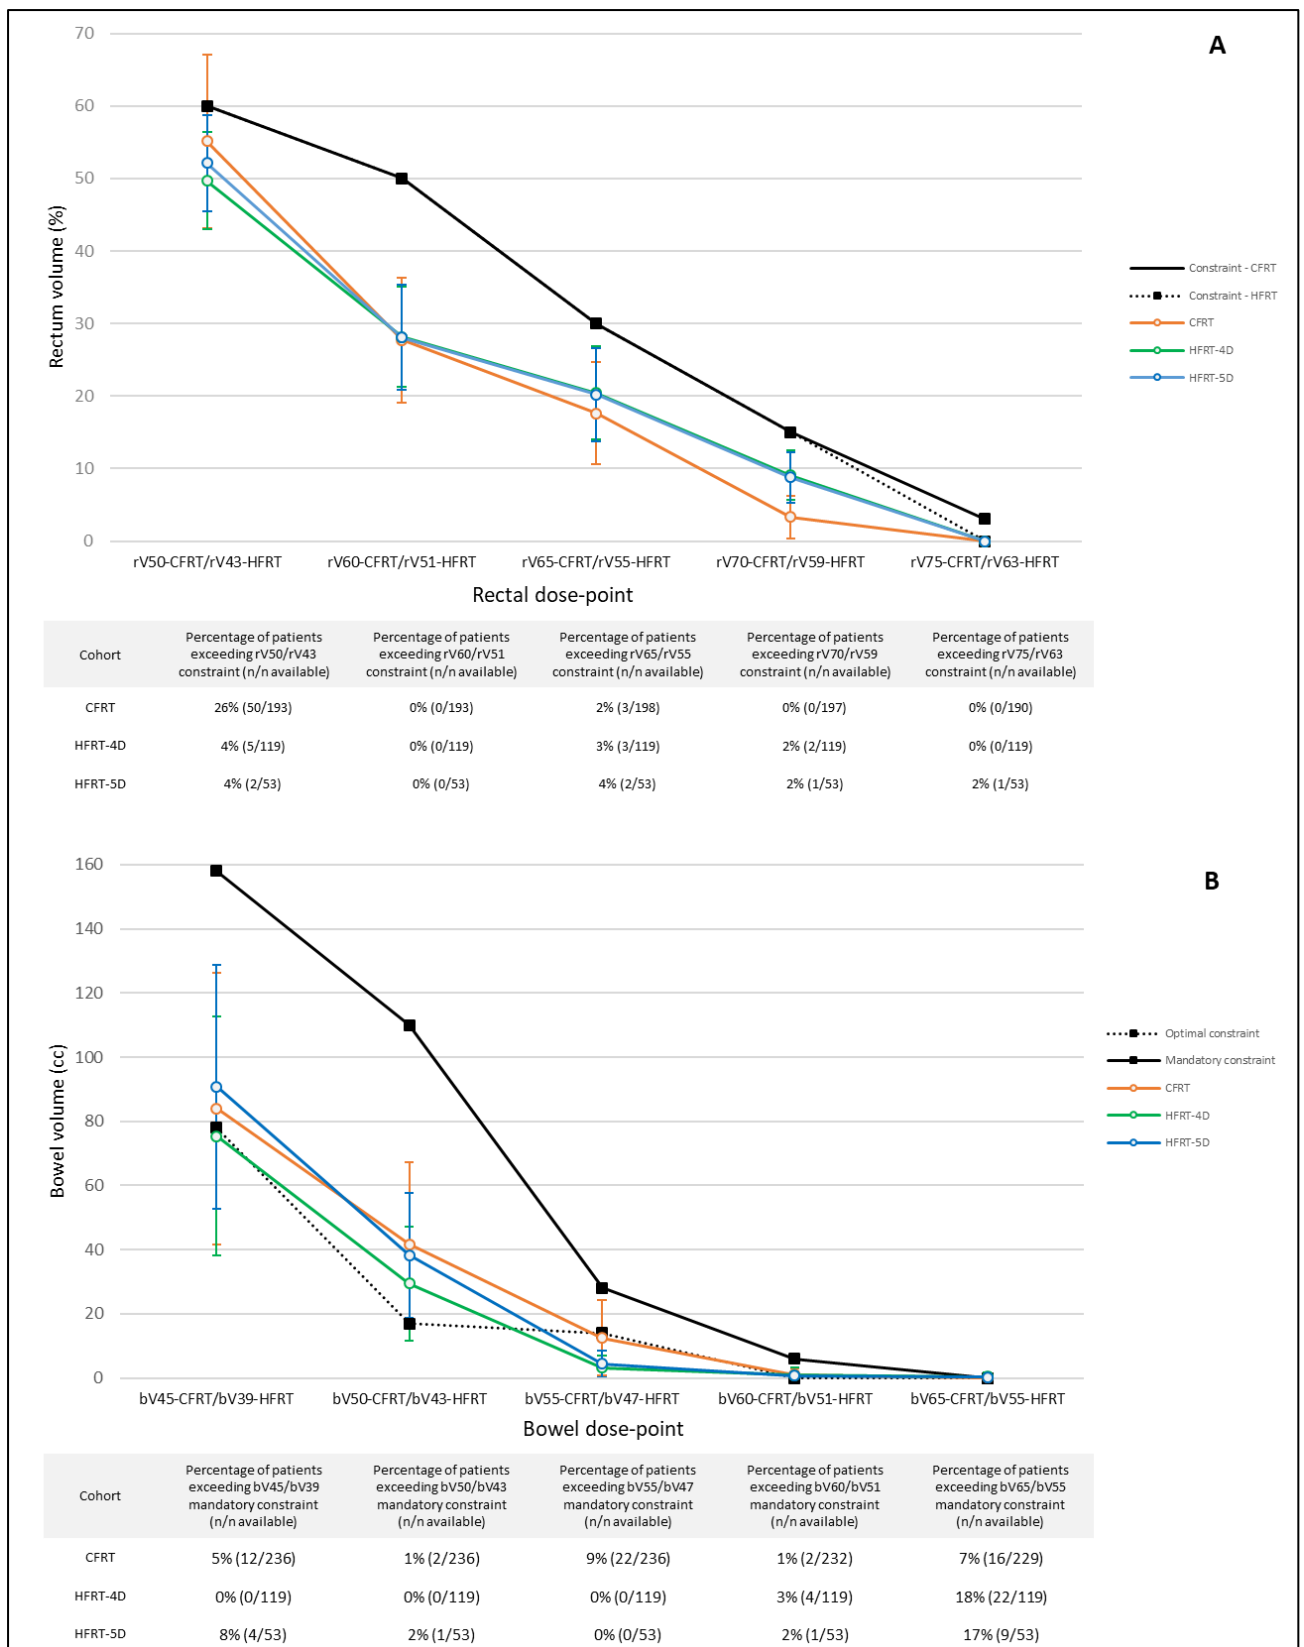

**Figure SUPP-2:** Mean volumes per dose-point by cohort and relationship with dose-volume constraints for rectum (A) and bowel (B). Error bars represent standard deviations. Constraint curves (black) are illustrative.

**Table SUPP-10:** Proportions of  $\delta M$  by organ and toxicity scale.

| RECTUM                    |      |        |        |          |        |        |          |        |        |
|---------------------------|------|--------|--------|----------|--------|--------|----------|--------|--------|
| $\delta M$                | RTOG |        |        | LENT-SOM |        |        | UCLA-PCI |        |        |
|                           | CFRT | HFRT4D | HFRT5D | CFRT     | HFRT4D | HFRT5D | CFRT     | HFRT4D | HFRT5D |
| $\delta M < -5\%$         | 0.0  | 0.0    | 3.1    | 0.0      | 8.9    | 0.0    | 0.0      | 0.0    | 0.0    |
| $-5 < \delta M \leq -4\%$ | 0.0  | 0.0    | 0.0    | 0.0      | 1.8    | 0.0    | 0.0      | 0.0    | 0.0    |
| $-4 < \delta M \leq -3\%$ | 0.0  | 0.0    | 0.0    | 1.9      | 0.0    | 5.4    | 0.0      | 2.5    | 2.8    |
| $-3 < \delta M \leq -2\%$ | 3.1  | 6.3    | 0.0    | 3.8      | 5.4    | 1.8    | 0.0      | 10.0   | 8.3    |
| $-2 < \delta M \leq -1\%$ | 3.1  | 9.4    | 3.1    | 3.8      | 8.9    | 3.6    | 2.8      | 22.5   | 8.3    |
| $-1 < \delta M \leq 0\%$  | 25.0 | 25.0   | 12.5   | 17.3     | 10.7   | 3.6    | 33.3     | 12.5   | 8.3    |
| $0 < \delta M \leq 1\%$   | 25.0 | 9.4    | 18.8   | 25.0     | 23.2   | 14.3   | 8.3      | 12.5   | 13.9   |
| $1 < \delta M \leq 2\%$   | 21.9 | 28.1   | 25.0   | 17.3     | 17.9   | 21.4   | 27.8     | 17.5   | 11.1   |
| $2 < \delta M \leq 3\%$   | 12.5 | 6.3    | 12.5   | 5.8      | 17.9   | 14.3   | 16.7     | 12.5   | 19.4   |
| $3 < \delta M \leq 4\%$   | 6.3  | 12.5   | 12.5   | 9.6      | 5.4    | 17.9   | 5.6      | 5.0    | 13.9   |
| $4 < \delta M \leq 5\%$   | 0.0  | 3.1    | 9.4    | 5.8      | 0.0    | 7.1    | 5.6      | 5.0    | 0.0    |
| $5 < \delta M \leq 6\%$   | 0.0  | 0.0    | 3.1    | 7.7      | 0.0    | 10.7   | 0.0      | 0.0    | 5.6    |
| $\delta M > 6\%$          | 3.1  | 0.0    | 0.0    | 1.9      | 0.0    | 0.0    | 0.0      | 0.0    | 8.3    |

  

| BOWEL                               |      |        |        |          |        |        |          |        |        |
|-------------------------------------|------|--------|--------|----------|--------|--------|----------|--------|--------|
| $\delta M$                          | RTOG |        |        | LENT-SOM |        |        | UCLA-PCI |        |        |
|                                     | CFRT | HFRT4D | HFRT5D | CFRT     | HFRT4D | HFRT5D | CFRT     | HFRT4D | HFRT5D |
| $\delta M \leq -25\text{cc}$        | 0.0  | 0.0    | 0.0    | 0.0      | 0.0    | 0.0    | 0.0      | 0.0    | 0.0    |
| $-25 < \delta M \leq -20\text{ cc}$ | 0.0  | 0.0    | 0.0    | 0.0      | 0.0    | 0.0    | 3.7      | 0.0    | 0.0    |
| $-20 < \delta M \leq -15\text{ cc}$ | 0.0  | 0.0    | 0.0    | 0.0      | 0.0    | 0.0    | 3.7      | 0.0    | 14.8   |
| $-15 < \delta M \leq -10\text{ cc}$ | 8.3  | 0.0    | 0.0    | 13.3     | 0.0    | 0.0    | 14.8     | 0.0    | 3.7    |
| $-10 < \delta M \leq -5\text{ cc}$  | 16.7 | 0.0    | 8.3    | 26.7     | 8.3    | 0.0    | 18.5     | 0.0    | 18.5   |
| $-5 < \delta M \leq 0\text{ cc}$    | 41.7 | 16.7   | 41.7   | 20.0     | 12.5   | 33.3   | 29.6     | 0.0    | 37.0   |
| $0 < \delta M \leq 5\text{ cc}$     | 25.0 | 25.0   | 16.7   | 26.7     | 37.5   | 33.3   | 25.9     | 44.4   | 3.7    |
| $5 < \delta M \leq 10\text{ cc}$    | 0.0  | 16.7   | 25.0   | 0.0      | 20.8   | 0.0    | 3.7      | 25.9   | 11.1   |
| $10 < \delta M \leq 15\text{ cc}$   | 0.0  | 8.3    | 8.3    | 0.0      | 4.2    | 11.1   | 0.0      | 14.8   | 11.1   |
| $15 < \delta M \leq 20\text{ cc}$   | 8.3  | 8.3    | 0.0    | 6.7      | 4.2    | 11.1   | 0.0      | 3.7    | 0.0    |
| $20 < \delta M \leq 25\text{ cc}$   | 0.0  | 8.3    | 0.0    | 0.0      | 8.3    | 0.0    | 0.0      | 7.4    | 0.0    |
| $\geq 25\text{ cc}$                 | 0.0  | 16.7   | 0.0    | 6.7      | 4.2    | 11.1   | 0.0      | 3.7    | 0.0    |

*All results are % unless otherwise indicated.*

## 1 – DOSE-VOLUME ASSOCIATIONS - RECTUM

### A - Rectum RTOG (TABLES R1-3)

|                  |            | RTOG item ->                 | Bowel frequency |       | Rectal bleeding |       | Diarrhoea |       | Proctitis |       |       |
|------------------|------------|------------------------------|-----------------|-------|-----------------|-------|-----------|-------|-----------|-------|-------|
|                  |            | Symptom threshold ->         | MS              | M     | MS              | M     | MS        | M     | MS        | M     |       |
| TABLE R1<br>CFRT | N          | Symptomatic patients (n)     | 19              | 76    | 18              | 62    | 27        | 67    | 20        | 66    |       |
|                  |            | Non-symptomatic patients (n) | 179             | 122   | 172             | 128   | 178       | 138   | 185       | 139   |       |
|                  |            | NA patients                  | 7               | 7     | 15              | 15    | 0         | 0     | 0         | 0     |       |
|                  |            | TOTAL                        | 205             | 205   | 205             | 205   | 205       | 205   | 205       | 205   |       |
|                  |            |                              |                 |       |                 |       |           |       |           |       |       |
|                  |            | rV50                         | p               | 0.90  | 0.09            | 0.00  | 0.15      | 0.90  | 0.59      | 0.31  | 0.36  |
|                  |            |                              | $\delta M$      | -0.60 | 1.20            | 7.10  | 0.90      | -1.10 | -2.40     | 1.90  | -0.10 |
|                  |            | rV60                         | p               | 0.25  | 0.01            | 0.18  | 0.49      | 0.94  | 1.00      | 0.48  | 0.82  |
|                  |            |                              | $\delta M$      | 2.60  | 3.85            | 1.85  | 0.80      | -0.31 | -0.05     | 1.40  | 0.60  |
|                  |            | rV65                         | p               | 0.24  | 0.06            | 0.35  | 0.42      | 0.94  | 0.96      | 0.48  | 0.99  |
|                  | $\delta M$ |                              | 2.10            | 2.56  | 3.10            | 2.80  | 1.45      | 1.45  | 1.90      | 0.15  |       |
|                  | rV70       | p                            | 0.71            | 0.88  | 1.00            | 0.80  | 0.82      | 0.57  | 0.64      | 0.97  |       |
|                  |            | $\delta M$                   | 0.40            | 0.24  | 0.00            | -0.20 | 0.28      | 0.00  | 0.70      | -0.15 |       |

#### LEGEND FOR ALL TABLES:

Symptom thresholds:

- M = mild threshold
- MS = moderate/severe threshold

Where highlighted in green, a positive association ( $\delta M > 0$  and  $p \leq 0.05$ ) was found.

Where highlighted in yellow,  $p \leq 0.05$  but  $\delta M = 0.00$  (minimal difference between groups).

Where highlighted in red,  $p \leq 0.05$  but  $\delta M < 0$  (defined as non-biologically plausible).



| TABLE R2<br>HFRT-4D          | RTOG item ->         |                          | Bowel frequency |       | Rectal bleeding |       | Diarrhoea |       | Proctitis |    |
|------------------------------|----------------------|--------------------------|-----------------|-------|-----------------|-------|-----------|-------|-----------|----|
|                              | Symptom threshold -> |                          | MS              | M     | MS              | M     | MS        | M     | MS        | M  |
|                              | N                    | Symptomatic patients (n) | 12              | 30    | 8               | 46    | 10        | 29    | 13        | 36 |
| Non-symptomatic patients (n) |                      | 95                       | 77              | 97    | 59              | 103   | 84        | 100   | 77        |    |
| NA patients                  |                      | 7                        | 7               | 9     | 9               | 1     | 1         | 1     | 1         |    |
| TOTAL                        |                      | 114                      | 114             | 114   | 114             | 114   | 114       | 114   | 114       |    |
|                              |                      |                          |                 |       |                 |       |           |       |           |    |
| rV43                         | p                    | 0.77                     | 0.71            | 0.56  | 0.10            | 0.78  | 0.22      | 0.60  | 0.46      |    |
|                              | $\delta M$           | 0.32                     | -0.40           | 3.48  | 3.13            | -0.68 | 1.80      | 1.80  | 2.06      |    |
| rV51                         | p                    | 0.16                     | 0.80            | 1.00  | 0.02            | 0.73  | 0.98      | 1.00  | 0.81      |    |
|                              | $\delta M$           | 0.32                     | -0.40           | 3.48  | 3.13            | -0.68 | 1.80      | 1.80  | 2.06      |    |
| rV55                         | p                    | 0.41                     | 0.50            | 0.55  | 0.00            | 0.79  | 0.72      | 0.60  | 0.92      |    |
|                              | $\delta M$           | -2.40                    | 1.64            | 1.56  | 4.15            | -2.55 | 1.60      | 1.35  | 0.95      |    |
| rV59                         | p                    | 0.64                     | 0.49            | 0.94  | 0.09            | 0.79  | 0.22      | 0.54  | 0.33      |    |
|                              | $\delta M$           | -0.75                    | -0.52           | -0.50 | 1.34            | -1.45 | -1.85     | -0.88 | -1.13     |    |

| RTOG item ->                 | Bowel frequency      |                          | Rectal bleeding |      | Diarrhoea |      | Proctitis |       |      |      |
|------------------------------|----------------------|--------------------------|-----------------|------|-----------|------|-----------|-------|------|------|
|                              | Symptom threshold -> |                          | MS              | M    | MS        | M    | MS        | M     |      |      |
|                              | N                    | Symptomatic patients (n) | 7               | 15   | 4         | 22   | 6         | 15    | 3    | 27   |
| Non-symptomatic patients (n) |                      | 41                       | 33              | 42   | 24        | 43   | 34        | 46    | 22   |      |
| NA patients                  |                      | 1                        | 1               | 3    | 3         | 0    | 0         | 0     | 0    |      |
| TOTAL                        |                      | 49                       | 49              | 49   | 49        | 49   | 49        | 49    | 49   |      |
|                              |                      |                          |                 |      |           |      |           |       |      |      |
| TABLE R3<br>HFRT-5D          | rV43                 | p                        | 0.84            | 0.56 | 0.84      | 0.68 | 0.21      | 0.69  | 0.53 | 0.34 |
|                              |                      | $\delta M$               | -0.27           | 1.35 | -0.37     | 0.17 | 4.30      | 1.45  | 1.45 | 3.05 |
|                              | rV51                 | p                        | 0.73            | 0.18 | 0.86      | 0.23 | 0.82      | 0.57  | 0.16 | 0.13 |
|                              |                      | $\delta M$               | 1.06            | 4.56 | -1.70     | 3.10 | 1.10      | -0.35 | 5.10 | 4.90 |
|                              | rV55                 | p                        | 0.45            | 0.23 | 0.81      | 0.12 | 0.65      | 0.91  | 0.37 | 0.15 |
|                              |                      | $\delta M$               | 3.50            | 2.85 | 1.70      | 2.88 | -1.34     | 0.68  | 2.38 | 3.23 |
|                              | rV59                 | p                        | 0.56            | 0.20 | 0.30      | 0.12 | 0.92      | 0.58  | 0.48 | 0.00 |
|                              |                      | $\delta M$               | 0.55            | 1.50 | 0.65      | 1.85 | -0.21     | 0.40  | 0.42 | 2.30 |

**B - Rectum LENT/SOM (TABLES R 4-6)**

|                      | LENT SOM item ->     |                              | Tenesmus (subjective) |       | Mucosal loss (subjective) |      | Frequency (subjective) |       | Sphincter control (subjective) |       | Pain (subjective) | Bleeding (objective) |      | Tenesmus and frequency (management) |       |
|----------------------|----------------------|------------------------------|-----------------------|-------|---------------------------|------|------------------------|-------|--------------------------------|-------|-------------------|----------------------|------|-------------------------------------|-------|
|                      | Symptom threshold -> |                              | MS                    | M     | MS                        | M    | MS                     | M     | MS                             | M     | M                 | MS                   | M    | MS                                  | M     |
| <b>TABLE R4 CFRT</b> | <b>N</b>             | Symptomatic patients (n)     | 18                    | 56    | 12                        | 43   | 13                     | 64    | 11                             | 37    | 13                | 16                   | 42   | 12                                  | 23    |
|                      |                      | Non-symptomatic patients (n) | 184                   | 146   | 192                       | 161  | 183                    | 132   | 193                            | 167   | 191               | 178                  | 152  | 192                                 | 181   |
|                      |                      | NA patients                  | 3                     | 3     | 1                         | 1    | 9                      | 9     | 1                              | 1     | 1                 | 11                   | 11   | 1                                   | 1     |
|                      |                      | <b>TOTAL</b>                 | 205                   | 205   | 205                       | 205  | 205                    | 205   | 205                            | 205   | 205               | 205                  | 205  | 205                                 | 205   |
|                      |                      |                              |                       |       |                           |      |                        |       |                                |       |                   |                      |      |                                     |       |
| <b>TABLE R4 CFRT</b> | <b>rV50</b>          | <b>p</b>                     | 0.74                  | 0.58  | 0.18                      | 0.10 | 0.96                   | 0.84  | 0.32                           | 0.44  | 0.81              | 0.00                 | 0.04 | 0.81                                | 0.26  |
|                      |                      | <b>δM</b>                    | -2.15                 | -0.70 | 1.15                      | 0.15 | -2.25                  | 0.10  | 5.25                           | -0.25 | -0.45             | 8.50                 | 1.75 | -1.60                               | -3.80 |
|                      | <b>rV60</b>          | <b>p</b>                     | 0.52                  | 0.13  | 0.00                      | 0.00 | 0.80                   | 0.38  | 0.22                           | 0.01  | 0.91              | 0.04                 | 0.26 | 0.41                                | 0.62  |
|                      |                      | <b>δM</b>                    | 0.75                  | 2.25  | 4.95                      | 3.30 | 0.90                   | 1.26  | 3.30                           | 3.21  | -0.10             | 5.23                 | 1.11 | 1.20                                | 0.75  |
|                      | <b>rV65</b>          | <b>p</b>                     | 0.65                  | 0.29  | 0.01                      | 0.00 | 0.82                   | 0.77  | 0.47                           | 0.04  | 0.75              | 0.05                 | 0.14 | 0.48                                | 0.80  |
|                      |                      | <b>δM</b>                    | 0.74                  | 2.73  | 5.54                      | 4.30 | 1.40                   | 1.05  | 3.20                           | 4.10  | -1.00             | 5.69                 | 3.45 | 2.50                                | 1.50  |
|                      | <b>rV70</b>          | <b>p</b>                     | 0.66                  | 0.68  | 0.17                      | 0.23 | 0.47                   | 0.30  | 0.60                           | 0.54  | 0.28              | 0.22                 | 0.48 | 0.95                                | 0.77  |
|                      |                      | <b>δM</b>                    | -0.10                 | -0.30 | 0.60                      | 0.61 | 0.50                   | -0.67 | 0.80                           | 0.55  | -0.60             | 1.20                 | 0.67 | -0.35                               | 0.28  |

| LENT SOM item -> |                              | Tenesmus (subjective) |       | Mucosal loss (subjective) |      | Frequency (subjective) |      | Sphincter control (subjective) |       | Pain (subjective) | Bleeding (objective) |      | Tenesmus and frequency (management) |       | Bleeding (management) |
|------------------|------------------------------|-----------------------|-------|---------------------------|------|------------------------|------|--------------------------------|-------|-------------------|----------------------|------|-------------------------------------|-------|-----------------------|
|                  |                              | MS                    | M     | MS                        | M    | MS                     | M    | MS                             | M     | M                 | MS                   | M    | MS                                  | M     | M                     |
| N                | Symptomatic patients (n)     | 11                    | 36    | 6                         | 25   | 13                     | 36   | 7                              | 28    | 11                | 17                   | 33   | 11                                  | 21    | 16                    |
|                  | Non-symptomatic patients (n) | 103                   | 78    | 108                       | 89   | 97                     | 74   | 107                            | 86    | 100               | 92                   | 76   | 103                                 | 93    | 98                    |
|                  | NA patients                  | 0                     | 0     | 0                         | 0    | 4                      | 4    | 0                              | 0     | 3                 | 5                    | 5    | 0                                   | 0     | 0                     |
|                  | TOTAL                        | 114                   | 114   | 114                       | 114  | 114                    | 114  | 114                            | 114   | 114               | 114                  | 114  | 114                                 | 114   | 114                   |
|                  |                              |                       |       |                           |      |                        |      |                                |       |                   |                      |      |                                     |       |                       |
| rV43             | p                            | 0.70                  | 0.34  | 0.76                      | 0.07 | 0.76                   | 0.13 | 0.18                           | 0.47  | 0.27              | 0.83                 | 0.79 | 0.78                                | 0.94  | 0.72                  |
|                  | δM                           | -0.30                 | 1.91  | -1.23                     | 2.60 | 2.05                   | 2.74 | -2.15                          | 1.00  | 3.60              | 0.19                 | 0.29 | -0.06                               | -0.80 | -1.45                 |
| rV51             | p                            | 0.19                  | 0.76  | 0.32                      | 0.04 | 0.42                   | 0.42 | 0.89                           | 0.58  | 0.30              | 0.65                 | 0.86 | 0.19                                | 0.20  | 0.34                  |
|                  | δM                           | -7.10                 | 0.10  | 2.02                      | 2.83 | 0.80                   | 2.85 | 1.10                           | -0.15 | 0.70              | 1.60                 | 1.27 | -7.00                               | -4.20 | 0.23                  |
| rV55             | p                            | 0.23                  | 0.49  | 0.20                      | 0.03 | 0.78                   | 0.21 | 0.98                           | 0.84  | 0.38              | 0.34                 | 0.45 | 0.37                                | 0.40  | 0.10                  |
|                  | δM                           | -6.45                 | 1.26  | 2.90                      | 3.90 | 1.40                   | 3.30 | 1.40                           | 0.51  | 1.11              | 2.00                 | 1.45 | -6.10                               | -5.60 | 0.98                  |
| rV59             | p                            | 0.12                  | 0.67  | 0.89                      | 0.21 | 0.73                   | 0.56 | 0.27                           | 0.33  | 0.45              | 0.71                 | 0.57 | 0.21                                | 0.42  | 0.03                  |
|                  | δM                           | -1.80                 | -0.73 | 0.50                      | 2.05 | -0.40                  | 0.86 | -2.27                          | -1.23 | 1.84              | 0.17                 | 0.17 | -2.70                               | -1.80 | 2.43                  |

| LENT SOM item -> |                              | Tenesmus (subjective) |      | Mucosal loss (subjective) |       | Frequency (subjective) |      | Sphincter control (subjective) |      | Pain (subjective) | Bleeding (objective) |       | Tenesmus and frequency (management) |      | Bleeding (management) |    |
|------------------|------------------------------|-----------------------|------|---------------------------|-------|------------------------|------|--------------------------------|------|-------------------|----------------------|-------|-------------------------------------|------|-----------------------|----|
|                  |                              | MS                    | M    | MS                        | M     | MS                     | M    | MS                             | M    | M                 | MS                   | M     | MS                                  | M    | M                     |    |
| N                | Symptomatic patients (n)     | 10                    | 19   | 3                         | 14    | 4                      | 20   | 5                              | 10   | 3                 | 12                   | 18    | 6                                   | 8    | 5                     |    |
|                  | Non-symptomatic patients (n) | 39                    | 30   | 46                        | 35    | 45                     | 29   | 44                             | 39   | 46                | 34                   | 28    | 42                                  | 40   | 44                    |    |
|                  | NA patients                  | 0                     | 0    | 0                         | 0     | 0                      | 0    | 0                              | 0    | 0                 | 3                    | 3     | 1                                   | 1    | 0                     |    |
|                  | TOTAL                        | 49                    | 49   | 49                        | 49    | 49                     | 49   | 49                             | 49   | 49                | 49                   | 49    | 49                                  | 49   | 49                    | 49 |
|                  |                              |                       |      |                           |       |                        |      |                                |      |                   |                      |       |                                     |      |                       |    |
| rV43             | p                            | 0.24                  | 0.58 | 0.88                      | 0.55  | 0.41                   | 0.40 | 0.34                           | 0.43 | 0.27              | 0.70                 | 0.57  | 0.17                                | 0.26 | 0.68                  |    |
|                  | δM                           | 1.15                  | 1.05 | 0.79                      | -0.38 | 4.20                   | 1.35 | 1.35                           | 1.45 | 5.99              | 1.75                 | -0.70 | 2.50                                | 2.50 | 0.65                  |    |
| rV51             | p                            | 0.18                  | 0.01 | 0.95                      | 0.20  | 0.62                   | 0.06 | 0.13                           | 0.26 | 0.45              | 0.53                 | 0.19  | 0.53                                | 0.14 | 0.17                  |    |
|                  | δM                           | 4.07                  | 5.92 | 0.70                      | 4.15  | -3.15                  | 5.91 | 5.90                           | 4.00 | -3.75             | 3.11                 | 4.69  | 2.26                                | 5.17 | 5.30                  |    |
| rV55             | p                            | 0.31                  | 0.01 | 0.40                      | 0.10  | 0.61                   | 0.19 | 0.42                           | 0.46 | 0.26              | 0.32                 | 0.10  | 0.93                                | 0.33 | 0.53                  |    |
|                  | δM                           | 2.65                  | 3.74 | 3.88                      | 3.55  | -1.34                  | 3.10 | 3.88                           | 0.76 | -2.92             | 2.70                 | 3.38  | 0.23                                | 3.40 | 1.98                  |    |
| rV59             | p                            | 0.13                  | 0.01 | 0.02                      | 0.07  | 0.24                   | 0.05 | 0.11                           | 0.39 | 0.42              | 0.04                 | 0.25  | 0.25                                | 0.18 | 0.73                  |    |
|                  | δM                           | 1.36                  | 2.25 | 3.90                      | 2.39  | -3.25                  | 1.86 | 0.90                           | 0.45 | -1.48             | 2.66                 | 1.91  | 1.16                                | 1.26 | 0.52                  |    |

C - Rectum UCLA-PCI (TABLES R7-9)

| UCLA item ->     | Bowel urgency                |     | Loose stools |       | Bowel distress | Crampy abdominal pain |       | Bowel problem |       |       |       |
|------------------|------------------------------|-----|--------------|-------|----------------|-----------------------|-------|---------------|-------|-------|-------|
|                  | MS                           | M   | MS           | M     | M              | MS                    | M     | MS            | M     |       |       |
| N                | Symptomatic patients (n)     | 43  | 61           | 29    | 63             | 42                    | 15    | 32            | 41    | 81    |       |
|                  | Non-symptomatic patients (n) | 118 | 100          | 134   | 100            | 137                   | 155   | 138           | 143   | 103   |       |
|                  | NA patients                  | 23  | 23           | 21    | 21             | 5                     | 14    | 14            | 0     | 0     |       |
|                  | TOTAL                        | 184 | 184          | 184   | 184            | 184                   | 184   | 184           | 184   | 184   |       |
|                  |                              |     |              |       |                |                       |       |               |       |       |       |
| TABLE R7<br>CFRT | rV50                         | p   | 0.04         | 0.00  | 0.40           | 0.81                  | 0.17  | 0.06          | 0.02  | 0.20  | 0.03  |
|                  |                              | δM  | 2.75         | 4.50  | -1.75          | -0.05                 | 1.00  | 4.35          | 3.20  | 1.80  | 2.35  |
|                  | rV60                         | p   | 0.33         | 0.28  | 0.56           | 0.94                  | 0.34  | 0.95          | 0.24  | 0.73  | 0.28  |
|                  |                              | δM  | 2.00         | 2.30  | 1.06           | 1.55                  | 2.30  | 0.15          | 2.15  | 1.50  | 3.35  |
|                  | rV65                         | p   | 0.49         | 0.23  | 0.66           | 0.54                  | 0.73  | 0.66          | 0.40  | 0.77  | 0.53  |
|                  |                              | δM  | 1.75         | 2.80  | 0.00           | 1.50                  | 1.70  | -0.40         | 1.68  | 1.00  | 1.70  |
|                  | rV70                         | p   | 0.34         | 0.67  | 0.18           | 0.19                  | 0.88  | 0.45          | 0.56  | 0.52  | 0.44  |
|                  |                              | δM  | -0.46        | -0.25 | -0.65          | -0.79                 | -0.10 | -0.20         | -0.28 | -0.10 | -0.20 |

| UCLA item ->                | Bowel urgency                |           | Loose stools |       | Bowel distress |      | Crampy abdominal pain |       | Bowel problem |       |       |       |
|-----------------------------|------------------------------|-----------|--------------|-------|----------------|------|-----------------------|-------|---------------|-------|-------|-------|
|                             | MS                           | M         | MS           | M     | MS             | M    | MS                    | M     | MS            | M     |       |       |
| <b>N</b>                    | Symptomatic patients (n)     | 47        | 34           | 12    | 34             | 6    | 32                    | 12    | 20            | 37    | 51    |       |
|                             | Non-symptomatic patients (n) | 37        | 50           | 68    | 46             | 87   | 61                    | 71    | 63            | 58    | 44    |       |
|                             | NA patients                  | 11        | 11           | 15    | 15             | 2    | 2                     | 12    | 12            | 0     | 0     |       |
|                             | <b>TOTAL</b>                 | 95        | 95           | 95    | 95             | 95   | 95                    | 95    | 95            | 95    | 95    |       |
|                             |                              |           |              |       |                |      |                       |       |               |       |       |       |
| <b>TABLE R8<br/>HFRT-4D</b> | <b>rV43</b>                  | <b>p</b>  | 0.33         | 0.33  | 0.99           | 0.03 | 0.71                  | 0.95  | 0.96          | 0.71  | 0.71  | 0.40  |
|                             |                              | <b>δM</b> | -2.29        | -2.84 | -2.24          | 4.56 | -2.65                 | -0.86 | -1.31         | -1.06 | -1.74 | 1.62  |
|                             | <b>rV51</b>                  | <b>p</b>  | 0.47         | 0.29  | 0.50           | 0.24 | 0.85                  | 0.96  | 0.93          | 0.34  | 0.76  | 0.80  |
|                             |                              | <b>δM</b> | -1.09        | -1.85 | 3.12           | 2.90 | -3.10                 | 1.36  | 0.95          | 2.75  | 1.68  | 1.04  |
|                             | <b>rV55</b>                  | <b>p</b>  | 0.40         | 0.16  | 0.28           | 0.28 | 0.98                  | 0.76  | 0.95          | 0.34  | 0.81  | 0.96  |
|                             |                              | <b>δM</b> | 0.84         | -1.10 | 4.49           | 3.62 | -1.40                 | 1.28  | 2.15          | 2.84  | 2.97  | 1.54  |
|                             | <b>rV59</b>                  | <b>p</b>  | 0.17         | 0.03  | 0.66           | 0.82 | 0.70                  | 0.05  | 0.84          | 0.80  | 0.34  | 0.49  |
|                             |                              | <b>δM</b> | -0.60        | -1.64 | 1.92           | 0.57 | 0.41                  | -1.68 | -0.22         | 0.55  | -0.25 | -0.55 |

| UCLA item ->        |                              | Bowel urgency |       | Loose stools |      | Bowel distress | Crampy abdominal pain |       | Bowel problem |      |       |
|---------------------|------------------------------|---------------|-------|--------------|------|----------------|-----------------------|-------|---------------|------|-------|
|                     |                              | MS            | M     | MS           | M    | M              | MS                    | M     | MS            | M    |       |
| N                   | Symptomatic patients (n)     | 24            | 20    | 8            | 16   | 13             | 6                     | 14    | 15            | 25   |       |
|                     | Non-symptomatic patients (n) | 16            | 20    | 32           | 24   | 32             | 35                    | 27    | 30            | 20   |       |
|                     | NA patients                  | 5             | 5     | 5            | 5    | 0              | 4                     | 4     | 0             | 0    |       |
|                     | TOTAL                        | 45            | 45    | 45           | 45   | 45             | 45                    | 45    | 45            | 45   |       |
|                     |                              |               |       |              |      |                |                       |       |               |      |       |
| TABLE R9<br>HFRT-5D | rV43                         | p             | 0.63  | 0.31         | 0.50 | 0.67           | 0.97                  | 0.01  | 0.13          | 0.95 | 0.45  |
|                     |                              | δM            | 0.99  | 2.05         | 2.40 | -0.91          | 0.44                  | 5.20  | 3.10          | 0.44 | -1.35 |
|                     | rV51                         | p             | 0.57  | 0.95         | 0.11 | 0.47           | 0.18                  | 0.75  | 0.60          | 0.37 | 0.49  |
|                     |                              | δM            | -3.39 | -0.65        | 7.15 | 5.03           | 6.51                  | 1.10  | 3.50          | 6.21 | -2.99 |
|                     | rV55                         | p             | 0.35  | 0.54         | 0.24 | 0.71           | 0.24                  | 0.73  | 0.89          | 0.48 | 0.27  |
|                     |                              | δM            | -2.12 | 0.08         | 3.50 | 3.10           | 3.00                  | 2.85  | 1.70          | 2.60 | -2.60 |
|                     | rV59                         | p             | 0.46  | 0.42         | 0.04 | 0.50           | 0.06                  | 0.87  | 0.96          | 0.12 | 0.40  |
|                     |                              | δM            | -1.70 | 0.45         | 4.00 | 1.25           | 2.67                  | -1.00 | 0.00          | 2.15 | 1.55  |



## 2 - DOSE-VOLUME ASSOCIATIONS - BOWEL

### A - Bowel RTOG (TABLES B1-3)

| RTOG item ->         | Bowel frequency              |       | Diarrhoea |        |       |
|----------------------|------------------------------|-------|-----------|--------|-------|
|                      | MS                           | M     | MS        | M      |       |
| Symptom threshold -> |                              |       |           |        |       |
| N                    | Symptomatic patients (n)     | 19    | 76        | 27     | 67    |
|                      | Non-symptomatic patients (n) | 179   | 122       | 178    | 138   |
|                      | NA patients                  | 7     | 7         | 0      | 0     |
|                      | TOTAL                        | 205   | 205       | 205    | 205   |
|                      |                              |       |           |        |       |
| bV45                 | p                            | 0.04  | 0.83      | 0.25   | 0.77  |
|                      | $\delta M$                   | 16.96 | -0.95     | -14.20 | 1.28  |
| bV50                 | p                            | 0.08  | 0.62      | 0.19   | 0.33  |
|                      | $\delta M$                   | 3.29  | -4.39     | -8.51  | -6.50 |
| bV55                 | p                            | 0.03  | 0.30      | 0.36   | 0.04  |
|                      | $\delta M$                   | 3.80  | -1.60     | -0.80  | -3.14 |

#### LEGEND FOR ALL TABLES:

Symptom thresholds:

- M = mild threshold
- MS = moderate/severe threshold

Where highlighted in **green**, a positive association ( $\delta M > 0$  and  $p \leq 0.05$ ) was found.

Where highlighted in **yellow**,  $p \leq 0.05$  but  $\delta M = 0.00$  (minimal difference between groups).

Where highlighted in **red**,  $p \leq 0.05$  but  $\delta M < 0$  (defined as non-biologically plausible).

|                             | RTOG item ->         |                              | Bowel frequency |       | Diarrhoea |       |
|-----------------------------|----------------------|------------------------------|-----------------|-------|-----------|-------|
|                             | Symptom threshold -> |                              | MS              | M     | MS        | M     |
| <b>TABLE B2<br/>HFRT-4D</b> | <b>N</b>             | Symptomatic patients (n)     | 12              | 31    | 10        | 30    |
|                             |                      | Non-symptomatic patients (n) | 100             | 81    | 108       | 88    |
|                             |                      | NA patients                  | 7               | 7     | 1         | 1     |
|                             |                      | <b>TOTAL</b>                 | 119             | 119   | 119       | 119   |
|                             |                      |                              |                 |       |           |       |
|                             | <b>bV39</b>          | <b>p</b>                     | 0.04            | 0.48  | 0.09      | 0.03  |
|                             |                      | <b>δM</b>                    | 27.17           | 6.68  | 28.20     | 17.32 |
|                             | <b>bV43</b>          | <b>p</b>                     | 0.11            | 0.59  | 0.03      | 0.01  |
|                             |                      | <b>δM</b>                    | 11.60           | -2.50 | 24.50     | 7.39  |
|                             | <b>bV47</b>          | <b>p</b>                     | 0.76            | 0.62  | 0.34      | 0.00  |
|                             |                      | <b>δM</b>                    | 1.07            | -0.70 | 1.71      | 2.15  |

|                             | RTOG item ->         |                                     | Bowel frequency |       | Diarrhoea |       |
|-----------------------------|----------------------|-------------------------------------|-----------------|-------|-----------|-------|
|                             | Symptom threshold -> |                                     | MS              | M     | MS        | M     |
| <b>TABLE B3<br/>HFRT-5D</b> | <b>N</b>             | <b>Symptomatic patients (n)</b>     | 7               | 15    | 6         | 15    |
|                             |                      | <b>Non-symptomatic patients (n)</b> | 41              | 33    | 43        | 34    |
|                             |                      | <b>NA patients</b>                  | 1               | 1     | 0         | 0     |
|                             |                      | <b>TOTAL</b>                        | 49              | 49    | 49        | 49    |
|                             |                      |                                     |                 |       |           |       |
|                             | <b>bV39</b>          | <b>p</b>                            | 0.89            | 1.00  | 0.73      | 0.76  |
|                             |                      | <b>δM</b>                           | -6.40           | -4.00 | 5.60      | 3.07  |
|                             | <b>bV43</b>          | <b>p</b>                            | 0.33            | 0.23  | 0.64      | 0.63  |
|                             |                      | <b>δM</b>                           | 12.90           | 5.20  | 6.11      | 1.34  |
|                             | <b>bV47</b>          | <b>p</b>                            | 0.53            | 0.51  | 0.31      | 0.29  |
|                             |                      | <b>δM</b>                           | -1.70           | -2.27 | -1.55     | -0.31 |

**B - Bowel LENT/SOM (TABLES B4-6)**

|                  | LENT SOM item ->     |                              | Frequency (subjective) | Consistency (subjective) |        | Consistency and frequency (management) |       |
|------------------|----------------------|------------------------------|------------------------|--------------------------|--------|----------------------------------------|-------|
|                  | Symptom threshold -> |                              | M                      | MS                       | M      | MS                                     | M     |
| TABLE B4<br>CFRT | N                    | Symptomatic patients (n)     | 57                     | 30                       | 45     | 12                                     | 19    |
|                  |                      | Non-symptomatic patients (n) | 139                    | 171                      | 156    | 192                                    | 185   |
|                  |                      | NA patients                  | 9                      | 4                        | 4      | 1                                      | 1     |
|                  |                      | TOTAL                        | 205                    | 205                      | 205    | 205                                    | 205   |
|                  |                      |                              |                        |                          |        |                                        |       |
|                  | bV45                 | p                            | 0.90                   | 0.34                     | 0.11   | 0.02                                   | 0.19  |
|                  |                      | $\delta M$                   | -8.78                  | -10.95                   | -12.85 | 52.70                                  | -4.50 |
|                  | bV50                 | p                            | 1.00                   | 0.26                     | 0.17   | 0.10                                   | 0.37  |
|                  |                      | $\delta M$                   | -5.90                  | -6.80                    | -9.25  | 15.20                                  | -0.60 |
|                  | bV55                 | p                            | 0.35                   | 0.96                     | 0.50   | 0.35                                   | 0.40  |
|                  |                      | $\delta M$                   | 1.60                   | 1.30                     | -2.10  | 3.39                                   | 3.37  |

|                         | LENT SOM item ->     |                                     | Frequency (subjective) |       | Consistency (subjective) |       | Pain (subjective) | Constipation (subjective) | Consistency and frequency (management) |      |
|-------------------------|----------------------|-------------------------------------|------------------------|-------|--------------------------|-------|-------------------|---------------------------|----------------------------------------|------|
|                         | Symptom threshold -> |                                     | MS                     | M     | MS                       | M     | M                 | M                         | MS                                     | M    |
| <b>TABLE B5 HFRT-4D</b> | <b>N</b>             | <b>Symptomatic patients (n)</b>     | 15                     | 34    | 11                       | 28    | 7                 | 13                        | 12                                     | 19   |
|                         |                      | <b>Non-symptomatic patients (n)</b> | 97                     | 78    | 102                      | 85    | 107               | 100                       | 102                                    | 95   |
|                         |                      | <b>NA patients</b>                  | 2                      | 2     | 1                        | 1     | 0                 | 1                         | 0                                      | 0    |
|                         |                      | <b>TOTAL</b>                        | 114                    | 114   | 114                      | 114   | 114               | 114                       | 114                                    | 114  |
|                         |                      |                                     |                        |       |                          |       |                   |                           |                                        |      |
|                         | <b>bV39</b>          | <b>p</b>                            | 0.02                   | 0.03  | 0.28                     | 0.14  | 0.59              | 0.72                      | 0.06                                   | 0.15 |
|                         |                      | <b>δM</b>                           | 27.50                  | 17.66 | 23.40                    | 14.51 | -7.84             | -8.77                     | 24.82                                  | 5.84 |
|                         | <b>bV43</b>          | <b>p</b>                            | 0.07                   | 0.29  | 0.04                     | 0.06  | 0.80              | 0.95                      | 0.27                                   | 0.30 |
|                         |                      | <b>δM</b>                           | 9.06                   | 2.58  | 8.33                     | 6.41  | -0.90             | 5.12                      | 1.15                                   | 1.10 |
|                         | <b>bV47</b>          | <b>p</b>                            | 0.35                   | 0.23  | 0.41                     | 0.28  | 0.67              | 0.54                      | 0.74                                   | 0.42 |
|                         |                      | <b>δM</b>                           | 0.83                   | 0.78  | -0.45                    | 0.60  | -0.40             | 1.85                      | 0.77                                   | 0.89 |

|                     | LENT SOM item ->     |                              | Frequency (subjective) |       | Consistency (subjective) |       | Consistency and frequency (management) |       |
|---------------------|----------------------|------------------------------|------------------------|-------|--------------------------|-------|----------------------------------------|-------|
|                     | Symptom threshold -> |                              | MS                     | M     | MS                       | M     | MS                                     | M     |
| TABLE B6<br>HFRT-5D | N                    | Symptomatic patients (n)     | 5                      | 14    | 8                        | 12    | 7                                      | 9     |
|                     |                      | Non-symptomatic patients (n) | 40                     | 31    | 38                       | 34    | 41                                     | 39    |
|                     |                      | NA patients                  | 4                      | 4     | 3                        | 3     | 1                                      | 1     |
|                     |                      | TOTAL                        | 49                     | 49    | 49                       | 49    | 49                                     | 49    |
|                     |                      |                              |                        |       |                          |       |                                        |       |
|                     | bV39                 | p                            | 0.69                   | 0.31  | 0.06                     | 0.05  | 0.67                                   | 0.53  |
|                     |                      | $\delta M$                   | 3.04                   | 2.18  | 29.90                    | 32.59 | 3.60                                   | 3.60  |
|                     | bV43                 | p                            | 0.33                   | 0.05  | 0.04                     | 0.03  | 0.61                                   | 0.47  |
|                     |                      | $\delta M$                   | 12.85                  | 13.48 | 18.76                    | 15.99 | 1.90                                   | 1.90  |
|                     | bV47                 | p                            | 0.93                   | 0.62  | 0.70                     | 0.65  | 0.30                                   | 0.45  |
|                     |                      | $\delta M$                   | -0.81                  | -2.07 | -2.19                    | -1.89 | -2.17                                  | -2.17 |

C - Bowel UCLA-PCI (TABLES B7-9)

| UCLA item ->             | Bowel urgency                |           | Loose stools |      | Bowel distress | Crampy abdominal pain |        | Bowel problem |        |       |        |
|--------------------------|------------------------------|-----------|--------------|------|----------------|-----------------------|--------|---------------|--------|-------|--------|
|                          | MS                           | M         | MS           | M    | M              | MS                    | M      | MS            | M      |       |        |
| <b>N</b>                 | Symptomatic patients (n)     | 43        | 61           | 29   | 63             | 42                    | 15     | 32            | 41     | 81    |        |
|                          | Non-symptomatic patients (n) | 118       | 100          | 134  | 100            | 137                   | 155    | 138           | 143    | 103   |        |
|                          | NA patients                  | 23        | 23           | 21   | 21             | 5                     | 14     | 14            | 0      | 0     |        |
|                          | <b>TOTAL</b>                 | 184       | 184          | 184  | 184            | 184                   | 184    | 184           | 184    | 184   |        |
|                          |                              |           |              |      |                |                       |        |               |        |       |        |
| <b>TABLE B7<br/>CFRT</b> | <b>bV45</b>                  | <b>p</b>  | 0.55         | 0.87 | 0.86           | 0.56                  | 0.32   | 0.09          | 0.34   | 0.88  | 0.23   |
|                          |                              | <b>δM</b> | -1.24        | 7.30 | 3.94           | -11.28                | -10.50 | -20.00        | -11.40 | -9.18 | -15.20 |
|                          | <b>bV50</b>                  | <b>p</b>  | 0.73         | 0.86 | 0.54           | 0.39                  | 0.23   | 0.20          | 0.49   | 0.63  | 0.14   |
|                          |                              | <b>δM</b> | 0.60         | 0.60 | -3.27          | -6.03                 | -8.35  | -7.60         | -3.86  | -5.47 | -11.70 |
|                          | <b>bV55</b>                  | <b>p</b>  | 0.51         | 0.97 | 0.84           | 0.85                  | 0.94   | 0.70          | 0.79   | 0.40  | 0.46   |
|                          |                              | <b>δM</b> | -1.20        | 1.00 | -0.10          | 0.70                  | 0.45   | -1.00         | -1.53  | 1.20  | -0.50  |

| UCLA item ->        |       | Bowel urgency                |       | Loose stools |       | Bowel distress |      | Crampy abdominal pain |       | Bowel problem |       |       |
|---------------------|-------|------------------------------|-------|--------------|-------|----------------|------|-----------------------|-------|---------------|-------|-------|
|                     |       | MS                           | M     | MS           | M     | MS             | M    | MS                    | M     | MS            | M     |       |
| TABLE B8<br>HFRT-4D | N     | Symptom threshold ->         |       |              |       |                |      |                       |       |               |       |       |
|                     |       | Symptomatic patients (n)     | 28    | 34           | 12    | 34             | 6    | 32                    | 12    | 20            | 37    | 51    |
|                     |       | Non-symptomatic patients (n) | 56    | 50           | 68    | 46             | 87   | 61                    | 71    | 63            | 58    | 44    |
|                     |       | NA patients                  | 11    | 11           | 15    | 15             | 2    | 2                     | 12    | 12            | 0     | 0     |
|                     | TOTAL | 95                           | 95    | 95           | 95    | 95             | 95   | 95                    | 95    | 95            | 95    | 95    |
|                     |       |                              |       |              |       |                |      |                       |       |               |       |       |
|                     | bV39  | p                            | 0.15  | 0.24         | 0.28  | 0.01           | 0.70 | 0.34                  | 0.10  | 0.41          | 0.04  | 0.04  |
|                     |       | δM                           | 18.47 | 8.27         | 20.85 | 24.78          | 7.45 | 4.59                  | 28.55 | 6.13          | 14.21 | 10.50 |
|                     | bV43  | p                            | 0.01  | 0.01         | 0.06  | 0.00           | 0.22 | 0.04                  | 0.09  | 0.08          | 0.00  | 0.00  |
|                     |       | δM                           | 8.80  | 7.04         | 9.90  | 11.74          | 1.19 | 4.10                  | 11.15 | 6.80          | 12.22 | 11.37 |
|                     | bV47  | p                            | 0.03  | 0.07         | 0.36  | 0.05           | 0.14 | 0.11                  | 0.30  | 0.35          | 0.02  | 0.15  |
|                     |       | δM                           | 1.54  | 1.29         | 0.60  | 0.07           | 3.63 | 1.33                  | 1.89  | 1.33          | 2.01  | 0.66  |



|                             | UCLA item ->         |                                     | Bowel urgency |        | Loose stools |       | Bowel distress | Crampy abdominal pain |       | Bowel problem |        |
|-----------------------------|----------------------|-------------------------------------|---------------|--------|--------------|-------|----------------|-----------------------|-------|---------------|--------|
|                             | Symptom threshold -> |                                     | MS            | M      | MS           | M     | M              | MS                    | M     | MS            | M      |
| <b>TABLE B9<br/>HFRT-5D</b> | <b>N</b>             | <b>Symptomatic patients (n)</b>     | 15            | 20     | 8            | 16    | 13             | 6                     | 14    | 15            | 25     |
|                             |                      | <b>Non-symptomatic patients (n)</b> | 25            | 20     | 32           | 24    | 32             | 35                    | 27    | 30            | 20     |
|                             |                      | <b>NA patients</b>                  | 5             | 5      | 5            | 5     | 0              | 4                     | 4     | 0             | 0      |
|                             |                      | <b>TOTAL</b>                        | 45            | 45     | 45           | 45    | 45             | 45                    | 45    | 45            | 45     |
|                             |                      |                                     |               |        |              |       |                |                       |       |               |        |
|                             | <b>bV39</b>          | <b>p</b>                            | 0.11          | 0.30   | 0.38         | 0.26  | 0.99           | 0.73                  | 0.58  | 0.78          | 0.74   |
|                             |                      | <b>δM</b>                           | -19.90        | -15.95 | -16.37       | 13.62 | 5.42           | 5.35                  | 13.63 | -11.78        | -16.12 |
|                             | <b>bV43</b>          | <b>p</b>                            | 0.08          | 0.23   | 0.43         | 0.30  | 0.19           | 0.58                  | 0.90  | 0.19          | 0.15   |
|                             |                      | <b>δM</b>                           | -6.27         | -8.29  | -5.53        | 10.95 | -4.48          | 8.73                  | -1.95 | -5.13         | -8.54  |
|                             | <b>bV47</b>          | <b>p</b>                            | 0.02          | 0.04   | 0.18         | 0.33  | 0.89           | 0.41                  | 0.68  | 0.73          | 0.67   |
|                             |                      | <b>δM</b>                           | -3.40         | -3.50  | -3.03        | 1.12  | -1.61          | -2.10                 | -1.05 | -0.41         | -0.98  |

**Table SUPP-11:** Results of ROC analysis: new constraints derived using the IMRT for Prostate Cancer Study dataset.

| CONSTRAINT  | ENDPOINT                                        | COHORT  | AUC  | CI<br>(lower-upper) | Constraint | Specificity | Sensitivity |
|-------------|-------------------------------------------------|---------|------|---------------------|------------|-------------|-------------|
| <b>rV50</b> | RTOG bleeding<br>(moderate/severe<br>threshold) | CFRT    | 0.79 | 0.69-0.89           | 58.9%      | 0.72        | 0.78        |
| <b>bV43</b> | UCLA loose stools<br>(mild threshold)           | HFRT-4D | 0.66 | 0.55-0.77           | 31.11cc    | 0.72        | 0.57        |
| <b>bV47</b> | RTOG diarrhoea<br>(mild threshold)              | HFRT-4D | 0.69 | 0.60-0.79           | 2.15cc     | 0.63        | 0.70        |

*AUC = area under the curve. CI = confidence interval.*

**Table SUPP-12:** Odds ratios for toxicity using protocol or new (data-derived) constraints.

| Item                                              | Constraint                                      | OR   | 95% CI     | P value  | Interpretation                                                                                              |
|---------------------------------------------------|-------------------------------------------------|------|------------|----------|-------------------------------------------------------------------------------------------------------------|
| <b>rV50 and MS RTOG bleeding (CFRT)</b>           | Protocol constraint<br>60% of rectal volume     | 7.09 | 2.54-22.05 | 0.0002   | The odds of MS RTOG bleeding are 7.09 higher when the rV50 protocol constraint is exceeded.                 |
|                                                   | Data-derived constraint<br>59% of rectal volume | 6.84 | 2.40-22.85 | 0.0002   | The odds of MS RTOG bleeding are 6.84 higher when the rV50 data-derived constraint is exceeded.             |
| <b>rV50 and MS LENT-SOM bleeding (CFRT)</b>       | Protocol constraint<br>60% of rectal volume     | 7.14 | 2.42-24.36 | 0.0003   | The odds of MS LENT-SOM bleeding are 7.14 higher when the rV50 protocol constraint is exceeded.             |
|                                                   | Data-derived constraint<br>59% of rectal volume | 7.41 | 2.42-28.39 | 0.0003   | The odds of MS LENT-SOM bleeding are 7.41 higher when the rV50 data-derived constraint is exceeded.         |
| <b>bV43 and M UCLA-PCI loose stools (HFRT-4D)</b> | Protocol optimal constraint<br>17cc of bowel    | 0.00 | 0.00-1.96  | 0.07     | The odds of M UCLA-PCI loose stools can not be calculated because all patients met the protocol constraint. |
|                                                   | Data-derived constraint<br>24cc of bowel        | 3.81 | 1.59-9.80  | 0.003    | The odds of M UCLA-PCI loose stools are 3.81 higher when the bV43 data-derived constraint is exceeded.      |
| <b>bV47 and M RTOG diarrhoea (HFRT-4D)</b>        | Protocol optimal constraint<br>14cc of bowel    | 5.51 | 1.79-21.49 | 0.003    | The odds of M RTOG diarrhoea are 5.51 higher when the bV47 protocol constraint is exceeded.                 |
|                                                   | Data-derived constraint<br>2.15cc of bowel      | 9.40 | 3.24-32.59 | 0.000001 | The odds of M RTOG diarrhoea are 9.40 higher when the bV47 data-derived constraint is exceeded.             |

M = mild toxicity threshold. MS = moderate/severe toxicity threshold. OR = odds ratio. CI = confidence interval. cc = cubic centimetres. P values were obtained with Fisher's exact test. No patients exceeded the mandatory bowel constraints for bV43 or bV47 so OR were not calculated.

## SUPPLEMENTARY TEXT

### Contouring guidelines for bowel and rectum:

- **Rectum:** The rectum was contoured as a solid organ from the anus (usually at the level of the ischial tuberosities or 1cm below the lower margin of the PTV, whichever was more inferior) to the recto-sigmoid junction.
- **Bowel:** Bowel was outlined separately by outlining bowel loops as a solid organ, excluding rectum and extending 2cm above the superior extent of PTV2. PTV2 included pelvic lymph nodes and uninvolved seminal vesicles with a further 0.5 cm margin.
